# Supplementary material
Source: PubMed Central journal article supplement (PMC4117403)
Supplement: NIHMS272743-supplement-Supplementary_Data.pdf [file NIHMS272743-supplement-Supplementary_Data.pdf]

# **CHEMISTRY**

---

## **A EUROPEAN JOURNAL**

---

### Supporting Information

© Copyright Wiley-VCH Verlag GmbH & Co. KGaA, 69451 Weinheim, 2011

#### **Genotyping by Alkaline Dehybridization Using Graphically Encoded Particles**

**Huaibin Zhang,<sup>[a]</sup> Adam J. DeConinck,<sup>[b]</sup> Scott C. Slimmer,<sup>[b]</sup> Patrick S. Doyle,<sup>[c]</sup>  
Jennifer A. Lewis,<sup>[b]</sup> and Ralph G. Nuzzo\*<sup>[a, b]</sup>**

chem\_201002848\_sm\_miscellaneous\_information.pdf

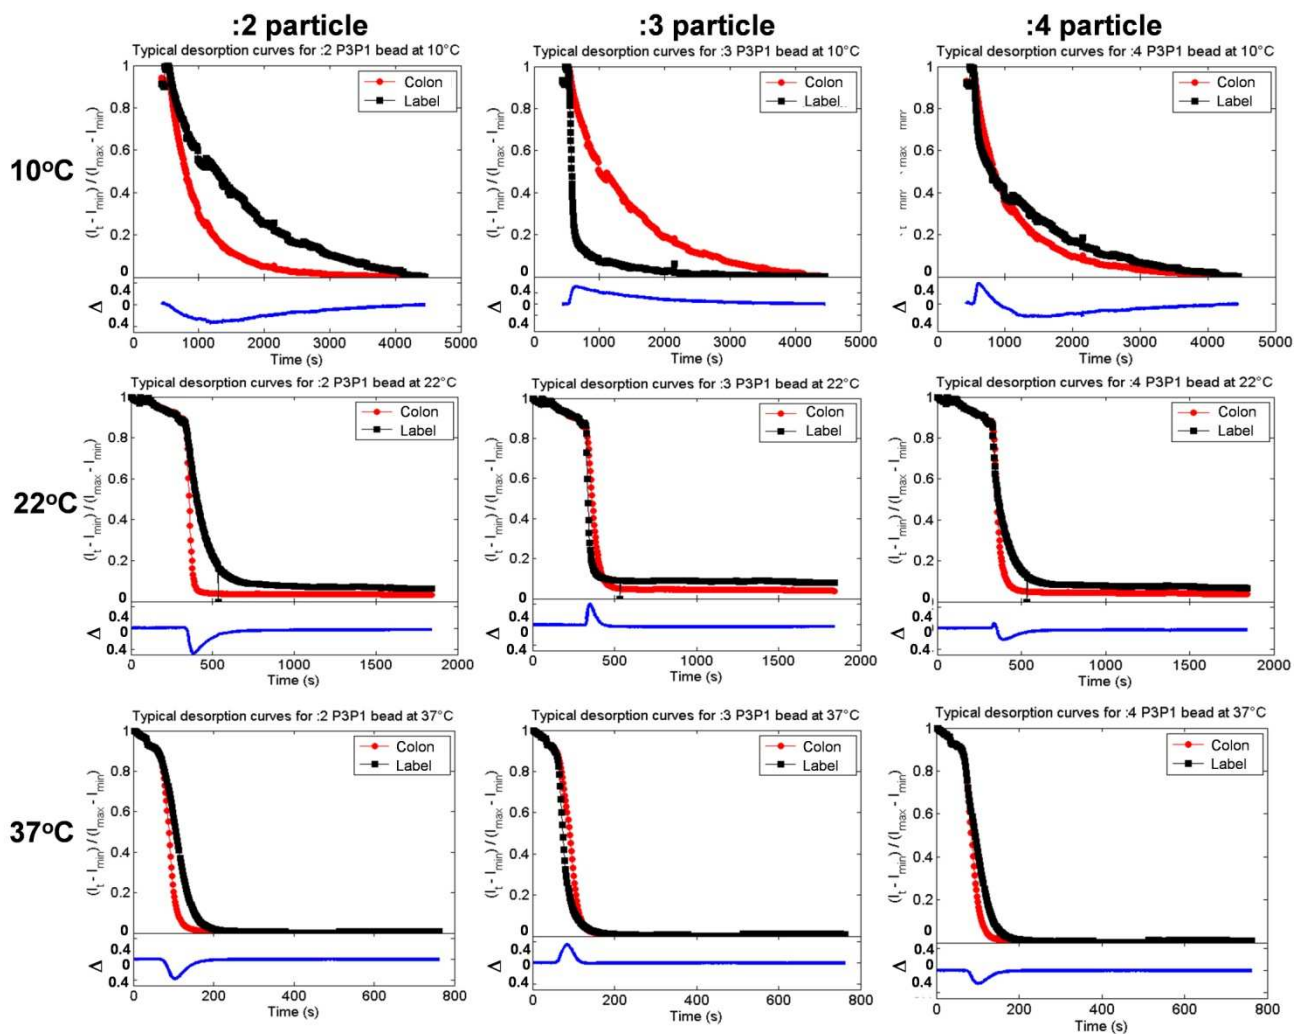

**Figure S1.** Retention ratio of each side and  $\Delta$  are plotted with respect to time for each hybridization case using P3/P1 particles, at increasing temperatures. Note that while the visible difference between the retention ratio curves becomes more difficult to discern at higher temperatures, the peak in  $\Delta$  remains a reliable indicator.

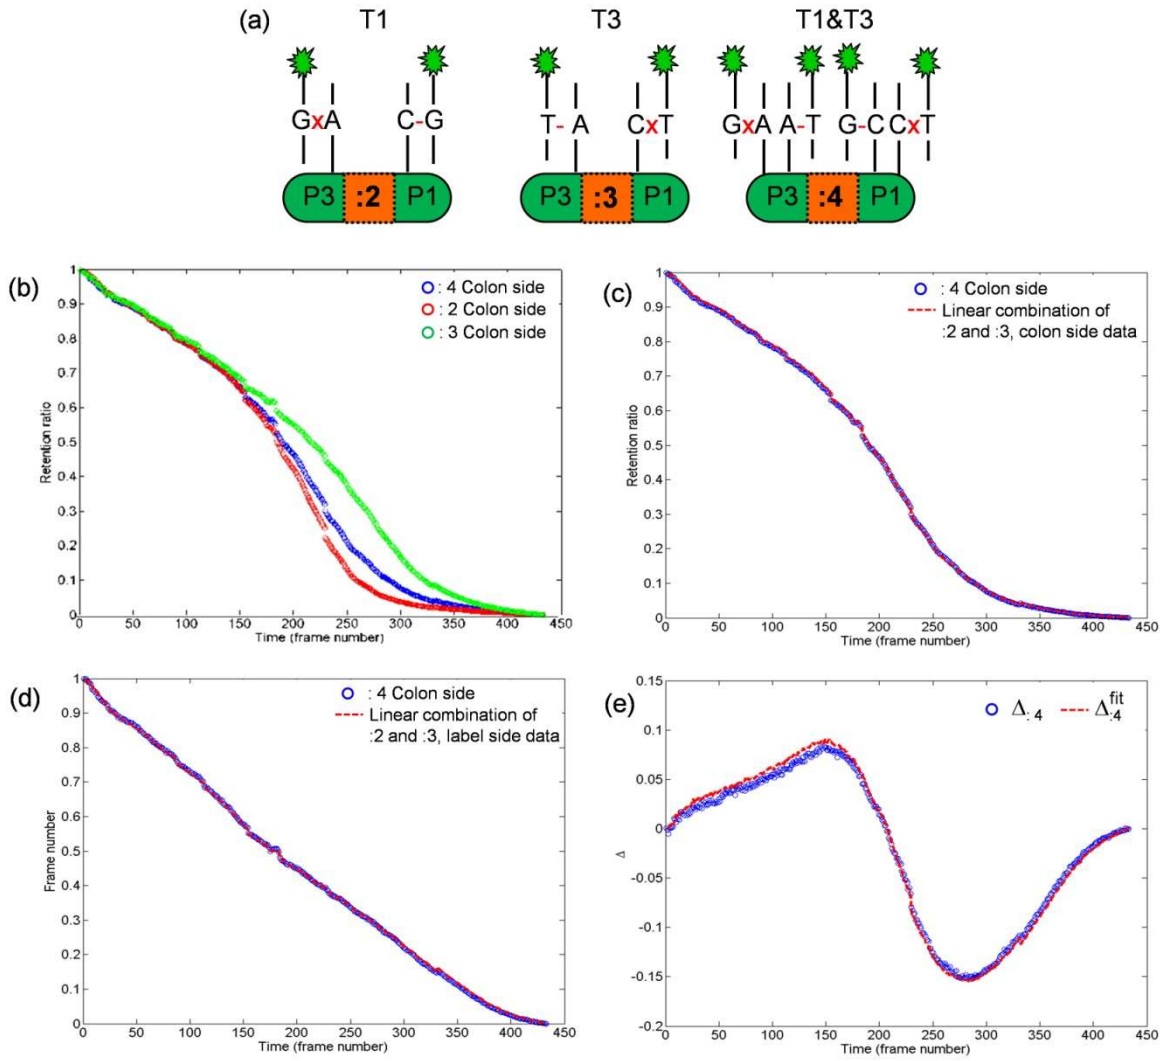

**Figure S2.** The hybridization schematic (a) shows the hybridized target strands in the two homozygous experiments, :2 and :3, and the heterozygous experiment, :4. Note that the PM and MM duplexes on either side of bead :4 are a combination of the duplexes on the corresponding sides of beads :2 and :3. In (b), we see the plotted retention ratios of :2, :3 and :4 on the colon side. The heterozygous colon-side signal (:4) can be expressed as a linear combination of the two homozygous colon-side signals (:2 and :3). As shown in Eq. S2.1, we calculate the linear combination using the relative fraction of  $R_{:2}$  as the fitting parameter ( $f_1$ ). Plotting this fitted colon-side data over the original colon-side :4 data (c) shows an extremely good fit ( $R^2=0.9996$ ). A similar procedure on the label side (d; Eq. S2.2) also fits extremely well ( $R^2=0.9998$ ). Subtracting the fitted label side data from the fitted colon side data (Eq. S2.3) produces a delta curve (e) which closely reproduces ( $R^2=0.9316$ ) the  $\Delta_{:4}$  calculated from the experimental data

$$R_{:4, \text{colon}}^{\text{fit}} = f_1 R_{:2, \text{colon}} + (1-f_1) R_{:3, \text{colon}} \quad \text{Eq (S2.1)}$$

$$R_{:4, \text{label}}^{\text{fit}} = f_2 R_{:2, \text{label}} + (1-f_2) R_{:3, \text{label}} \quad \text{Eq (S2.2)}$$

$$\Delta_{:4, \text{label}}^{\text{fit}} = R_{:4, \text{colon}}^{\text{fit}} - R_{:4, \text{label}}^{\text{fit}} \quad \text{Eq (S2.3)}$$

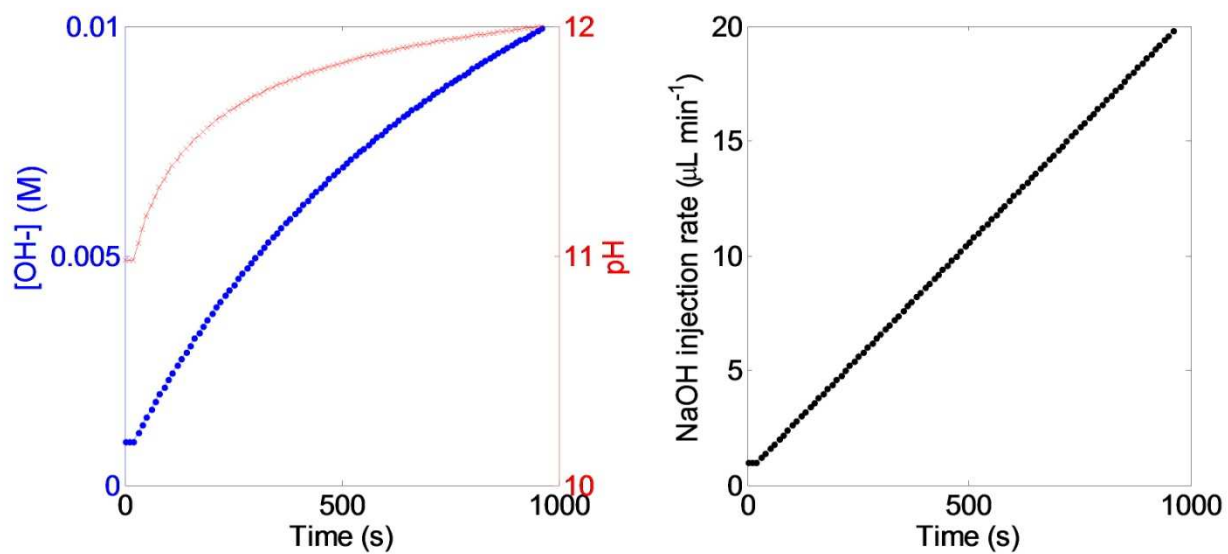

**Figure S3.** a) The calculated values for the  $[\text{OH}^-]$  and pH during the first thousand seconds of a dynamic alkaline dehybridization experiment. b) The programmed injection rate of the 0.02 M NaOH solution; injection rate of water is constant at 20  $\mu\text{L}/\text{min}$ .

**Table S1.** DNA sequences used in sandwich assay

| DNA                                             | Sequences                                                                                                      |
|-------------------------------------------------|----------------------------------------------------------------------------------------------------------------|
| MTHFR 1 <sup>st</sup> wild-type probe           | 5'-/Acryd/ ATG AAA TCG <b>GCT</b> CCC GCA GAC/-3'                                                              |
| MTHFR 1 <sup>st</sup> mutated probe             | 5'-/Acryd/ ATG AAA TCG <u>ACT</u> CCC GCA GAC/-3'                                                              |
| MTHFR wide-type target                          | 5'-/GAA GCA GGG AGC TTT GAG GCT GAC CTG AAG CAC TTG AAG GAG AAG GTG TCT GCG GGA <b>GCC</b> GAT TTC AT/-3'      |
| MTHFR mutated target                            | 5'-/GAA GCA GGG AGC TTT GAG GCT GAC CTG AAG CAC TTG AAG GAG AAG GTG TCT GCG GGA <u>GTC</u> GAT TTC AT/-3'      |
| MTHFR 2 <sup>nd</sup> probe                     | 5'-/CAA GTG CTT CAG GTC AGC CTC AAA GCT CCC TGC TTC- Alexa488/-3'                                              |
| Factor II 1 <sup>st</sup> wild-type probe       | 5'-/Acryd/ CTC AGC GAG CCT CAA TGC TCC/-3'                                                                     |
| Factor II 1 <sup>st</sup> mutated probe         | 5'-/Acryd/CTC AGC <u>AAG</u> CCT CAA TGC TCC/-3'                                                               |
| Factor II wide-type target                      | 5'-/TAG TAT TAC TGG CTC TTC CTG AGC CCA GAG AGC TGC CCA TGA ATA GCA CTG GGA GCA TTG AGG CTC GCT GAG/-3'        |
| Factor II mutated target                        | 5'-/TAG TAT TAC TGG CTC TTC CTG AGC CCA GAG AGC TGC CCA TGA ATA GCA CTG GGA GCA TTG AGG <u>CTT</u> GCT GAG/-3' |
| Factor II 1 <sup>st</sup> 2 <sup>nd</sup> probe | 5'-/CTC TGG GCT CAG GAA GAG CCA GTA ATA CTA/Alexa488/-3'                                                       |
| Factor V 1 <sup>st</sup> wild-type probe        | 5'-/Acryd/ TGG ACA GGC <b>GAG</b> GAA TAC AGG/-3'                                                              |
| Factor V 1 <sup>st</sup> mutated probe          | 5'-/Acryd/TGG ACA GGC <u>AAG</u> GAA TAC AGG/-3'                                                               |
| Factor V wide-type target                       | 5'-/GAA GAA ATT CTC AGA ATT TCT GAA AGG TTA CTT CAA GGA CAA AAT ACC TGT ATT CCT <b>CGC</b> CTG TCC A/-3'       |
| Factor V mutated target                         | 5'-GAA GAA ATT CTC AGA ATT TCT GAA AGG TTA CTT CAA GGA CAA AAT ACC TGT ATT CCT <u>TGC</u> CTG TCC A/-3'        |
| Factor V 2 <sup>nd</sup> probe                  | 5'-/TAA CCT TTC AGA AAT TCT GAG AAT TTC TTC/Alexa488/-3'                                                       |
